# Supplementary material for: Can Extracts from the Leaves and Fruits of the Cotoneaster Species Be Considered Promising Anti-Acne Agents?
Source: MDPI journal article supplement (doi:10.3390/molecules27092907), 2022-05-02
Supplement: s1 [file s1]

**Table S1.** High-resolution mass spectrometry (HR-MS) of [M-H]<sup>-</sup> ion and MS2 data.

| Peak No. | Name of Compound                           | [M-H] <sup>-</sup> | MS2                                                    | Theoretical Mass [M-H] <sup>-</sup> (Da) | Experimental Mass [M-H] <sup>-</sup> (Da) | Δ ppm | Δ mDa | Elemental Composition                           |
|----------|--------------------------------------------|--------------------|--------------------------------------------------------|------------------------------------------|-------------------------------------------|-------|-------|-------------------------------------------------|
| 1        | Mannitol                                   | 181                | 59,71,73,85,89,101b,113,119,163                        | 181.07122                                | 181.07118                                 | 0.22  | -0.04 | C <sub>6</sub> H <sub>13</sub> O <sub>6</sub>   |
| 2        | Gallic acid                                | 169                | 69, 79, 81, 97, 124, 125b                              | 169.0137                                 | 169.01373                                 | 0.18  | 0.03  | C <sub>7</sub> H <sub>6</sub> O <sub>5</sub>    |
| 3        | 3-O-Caffeoylquinic acid                    | 353                | 135, 179, 191b                                         | 353.08726                                | 353.08715                                 | 0.31  | -0.11 | C <sub>16</sub> H <sub>18</sub> O <sub>9</sub>  |
| 4        | Vanillic acid-hexoside                     | 329                | 136, 151, 167b, 329                                    | 329.08726                                | 329.08716                                 | 0.30  | -0.10 | C <sub>14</sub> H <sub>18</sub> O <sub>9</sub>  |
| 5        | Syringic acid hexoside                     | 359                | 85, 121, 138, 153, 197b                                | 359.09783                                | 359.09779                                 | 0.11  | -0.04 | C <sub>15</sub> H <sub>20</sub> O <sub>10</sub> |
| 6        | (+)-Catechin                               | 289                | 109, 123, 125, 137, 165, 179, 203, 205, 245, 289b      | 289.07122                                | 289.07117                                 | 0.17  | -0.05 | C <sub>15</sub> H <sub>14</sub> O <sub>6</sub>  |
| 7        | Procyanidin C-1                            | 865                | 125, 161, 243, 287, 289, 407, 425, 575, 577, 695, 865b | 865.19800                                | 865.19813                                 | 0.15  | 0.13  | C <sub>45</sub> H <sub>38</sub> O <sub>18</sub> |
| 8        | Protocatechuic acid                        | 153                | 109b, 153                                              | 153.01879                                | 153.01868                                 | 0.72  | -0.11 | C <sub>7</sub> H <sub>6</sub> O <sub>4</sub>    |
| 9        | Procyanidin B-2                            | 577                | 125, 289b, 407, 577                                    | 577.13461                                | 577.13449                                 | 0.21  | -0.12 | C <sub>30</sub> H <sub>26</sub> O <sub>12</sub> |
| 10       | 5-O-Caffeoylquinic acid (chlorogenic acid) | 353                | 179, 191b                                              | 353.08726                                | 353.08719                                 | 0.20  | -0.07 | C <sub>16</sub> H <sub>18</sub> O <sub>9</sub>  |
| 11       | p-Hydroxybenzoic acid                      | 137                | 92, 93, 136, 137b                                      | 137.02387                                | 137.02377                                 | 0.73  | -0.10 | C <sub>7</sub> H <sub>6</sub> O <sub>3</sub>    |
| 12       | (-)-Epicatechin                            | 289                | 109, 123, 125, 137, 151, 165, 179, 203, 205, 245, 289b | 289.07122                                | 289.07137                                 | 0.52  | 0.15  | C <sub>15</sub> H <sub>14</sub> O <sub>6</sub>  |
| 13       | 4-O-Caffeoylquinic acid                    | 353                | 135, 173b, 179, 191                                    | 353.08726                                | 353.08716                                 | 0.28  | -0.10 | C <sub>16</sub> H <sub>18</sub> O <sub>9</sub>  |
| 14       | Caffeic acid hexoside                      | 341                | 97, 107, 135, 179b, 341                                | 341.08726                                | 341.08739                                 | 0.38  | 0.13  | C <sub>15</sub> H <sub>18</sub> O <sub>9</sub>  |
| 15       | Caffeic acid                               | 179                | 97, 107, 135b                                          | 179.03444                                | 179.03453                                 | 0.50  | 0.09  | C <sub>9</sub> H <sub>8</sub> O <sub>4</sub>    |
| 16       | Syringic acid                              | 197                | 85, 121b, 138, 153, 181, 197                           | 197.04500                                | 197.04513                                 | 0.66  | 0.13  | C <sub>9</sub> H <sub>10</sub> O <sub>5</sub>   |
| 17       | p-Coumaric acid                            | 163                | 119, 162b                                              | 163.03952                                | 163.03962                                 | 0.61  | 0.10  | C <sub>9</sub> H <sub>8</sub> O <sub>3</sub>    |
| 18       | o-Coumaric acid                            | 163                | 119, 162b                                              | 163.03952                                | 163.03943                                 | 0.55  | -0.09 | C <sub>9</sub> H <sub>8</sub> O <sub>3</sub>    |
| 19       | Vanillin                                   | 151                | 136, 151b                                              | 151.03952                                | 151.03942                                 | 0.66  | -0.10 | C <sub>8</sub> H <sub>8</sub> O <sub>3</sub>    |
| 20       | Ferulic acid                               | 193                | 73, 89b, 106, 117, 133, 134, 179                       | 193.05009                                | 193.05021                                 | 0.62  | 0.12  | C <sub>10</sub> H <sub>10</sub> O <sub>4</sub>  |
| 21       | 3,5-Di-O-caffeoylquinic acid               | 515                | 191, 335, 353b, 515                                    | 515.11896                                | 515.11891                                 | 0.10  | -0.05 | C <sub>25</sub> H <sub>24</sub> O <sub>12</sub> |

|    |                                                          |     |                                               |           |           |      |       |                                                 |
|----|----------------------------------------------------------|-----|-----------------------------------------------|-----------|-----------|------|-------|-------------------------------------------------|
| 22 | Querectin 3-O-β-D-(6"-O-α-L-rhamnosyl) glucoside (rutin) | 609 | 151, 179, 301b, 463, 609                      | 609.18195 | 609.18207 | 0.20 | 0.12  | C <sub>27</sub> H <sub>30</sub> O <sub>16</sub> |
| 23 | 3-O- <i>p</i> -Coumaroylquinic acid                      | 337 | 163, 173b                                     | 337.09235 | 337.09249 | 0.42 | 0.14  | C <sub>16</sub> H <sub>18</sub> O <sub>8</sub>  |
| 24 | Quercetin 3-O-β-D-(2"-O-β-D-xylosyl)galactoside          | 595 | 151, 179, 301, 433b, 595                      | 595.12992 | 595.12983 | 0.15 | -0.09 | C <sub>26</sub> H <sub>28</sub> O <sub>16</sub> |
| 25 | 5-O- <i>p</i> -Coumaroylquinic acid                      | 337 | 163, 173b                                     | 337.09235 | 337.09221 | 0.42 | -0.14 | C <sub>16</sub> H <sub>18</sub> O <sub>8</sub>  |
| 26 | Quercetin-3-O-(2''-O-xylosyl)galactoside                 | 595 | 271,301b,435                                  | 595.12992 | 595.12999 | 0.12 | 0.07  | C <sub>26</sub> H <sub>27</sub> O <sub>16</sub> |
| 27 | Quercetin-3-O-gentiobioside                              | 625 | 271,301b,463                                  | 625.14048 | 625.14038 | 0.16 | -0.10 | C <sub>27</sub> H <sub>29</sub> O <sub>17</sub> |
| 28 | Vitexin-2''-O-arabinoside                                | 563 | 283,432b                                      | 563.14009 | 563.14001 | 0.14 | -0.08 | C <sub>26</sub> H <sub>27</sub> O <sub>14</sub> |
| 29 | Apigenin-6,8-C-dicelobioside                             | 593 | 325,386b,387                                  | 593.15065 | 593.15077 | 0.20 | 0.12  | C <sub>27</sub> H <sub>29</sub> O <sub>15</sub> |
| 30 | Vitexin-2''-O-rhamnoside                                 | 577 | 283,432b                                      | 577.15574 | 577.15571 | 0.05 | -0.03 | C <sub>27</sub> H <sub>29</sub> O <sub>14</sub> |
| 31 | Quercetin-3-O-glucoside (isoquercitrin)                  | 463 | 151, 179, 192, 301, 461, 463b                 | 463.08766 | 463.08749 | 0.37 | -0.17 | C <sub>21</sub> H <sub>20</sub> O <sub>12</sub> |
| 32 | Quercetin 3-O-β-D galactoside (hyperoside)               | 463 | 151, 179, 255, 271, 301b                      | 463.08766 | 463.08755 | 0.24 | -0.11 | C <sub>21</sub> H <sub>19</sub> O <sub>12</sub> |
| 33 | Kaempferol 3-O-glucoside (astragalin)                    | 447 | 284b,300                                      | 447.09274 | 447.09289 | 0.34 | 0.15  | C <sub>21</sub> H <sub>19</sub> O <sub>11</sub> |
| 34 | Quercetin 3-O-rhamnoside (quercitrin)                    | 447 | 151, 243, 255, 271, 300b, 301, 447            | 447.09274 | 447.09281 | 0.16 | 0.07  | C <sub>21</sub> H <sub>20</sub> O <sub>11</sub> |
| 35 | Hesperidin                                               | 609 | 151, 179, 301b, 302, 609                      | 609.18195 | 609.18181 | 0.23 | -0.14 | C <sub>28</sub> H <sub>34</sub> O <sub>15</sub> |
| 36 | Naringin                                                 | 579 | 145, 151, 271, 579b                           | 579.17139 | 579.17131 | 0.14 | -0.08 | C <sub>27</sub> H <sub>32</sub> O <sub>14</sub> |
| 37 | Biochanin-7-O-glucoside                                  | 445 | 132, 184, 212, 223, 239b, 240, 267, 268, 283b | 445.11348 | 445.11357 | 0.20 | 0.09  | C <sub>22</sub> H <sub>22</sub> O <sub>10</sub> |
| 38 | Rosmarinic acid                                          | 359 | 73, 123, 133, 135, 161b, 179, 197, 359        | 359.0767  | 359.07681 | 0.31 | 0.11  | C <sub>18</sub> H <sub>16</sub> O <sub>8</sub>  |
| 39 | Sinapic acid                                             | 223 | 59, 141, 148, 164b, 178, 208, 223             | 223.06065 | 223.06075 | 0.45 | 0.10  | C <sub>11</sub> H <sub>12</sub> O <sub>5</sub>  |
| 40 | Cinnamic acid                                            | 147 | 129, 147b                                     | 147.04461 | 147.04468 | 0.48 | 0.07  | C <sub>9</sub> H <sub>8</sub> O <sub>2</sub>    |
| 41 | Quercetin                                                | 301 | 151, 179b, 192, 209                           | 301.03483 | 301.03499 | 0.53 | 0.16  | C <sub>15</sub> H <sub>10</sub> O <sub>7</sub>  |
| 42 | Kaempferol                                               | 285 | 93, 97, 119b, 164, 285                        | 285.03992 | 285.03984 | 0.28 | -0.08 | C <sub>15</sub> H <sub>10</sub> O <sub>6</sub>  |

|    |                                                 |     |                                              |           |           |      |       |                                                  |
|----|-------------------------------------------------|-----|----------------------------------------------|-----------|-----------|------|-------|--------------------------------------------------|
| 43 | 7-Methylkaempferol-4'-O-glucoside               | 461 | 298b,315                                     | 461.10839 | 461.10849 | 0.22 | 0.10  | C <sub>22</sub> H <sub>21</sub> O <sub>11</sub>  |
| 44 | 3',4'-dihydroxy-6-methoxyflavone 7-O-rhamnoside | 429 | 255,283b,400,401                             | 429.11856 | 429.11853 | 0.07 | -0.03 | C <sub>22</sub> H <sub>21</sub> O <sub>9</sub>   |
| 45 | Apigenin 8-C-glucoside (vitexin)                | 431 | 283,311b,312,341                             | 429.11856 | 429.11842 | 0.33 | -0.14 | C <sub>21</sub> H <sub>19</sub> O <sub>10</sub>  |
| 46 | Apigenin 7-O-glucoside                          | 447 | 269b,270,431                                 | 431.09783 | 431.09797 | 0.32 | 0.14  | C <sub>21</sub> H <sub>19</sub> O <sub>10</sub>  |
| 47 | Biochanin A 7-O-glucoside (sissotrin)           | 445 | 132,211,223,224,239b,240,267                 | 445.11348 | 445.11355 | 0.16 | 0.07  | C <sub>22</sub> H <sub>21</sub> O <sub>10</sub>  |
| 48 | 5,7,2',5'-tetrahydroxyflavanone 7-O-glucoside   | 449 | 286b,302                                     | 449.10839 | 449.10825 | 0.31 | -0.14 | C <sub>21</sub> H <sub>21</sub> O <sub>11</sub>  |
| 49 | 5-Methylgenistein 4'-O-glucoside                | 445 | 255,283b,417,430                             | 445.11348 | 445.11339 | 0.20 | -0.09 | C <sub>22</sub> H <sub>21</sub> O <sub>10</sub>  |
| 50 | Orbicularin                                     | 315 | 153b,271                                     | 315.07161 | 315.07149 | 0.38 | -0.12 | C <sub>13</sub> H <sub>15</sub> O <sub>9</sub>   |
| 51 | Caffeoylmalic acid                              | 295 | 133,135,179b                                 | 295.0454  | 295.04533 | 0.24 | -0.07 | C <sub>13</sub> H <sub>11</sub> O <sub>8</sub>   |
| 52 | Prunasin                                        | 294 | 161b                                         | 294.09777 | 294.09771 | 0.20 | -0.06 | C <sub>14</sub> H <sub>16</sub> NO <sub>6</sub>  |
| 53 | Amygdalin                                       | 456 | 89,119,143,179,221,263,323b                  | 456.15059 | 456.15047 | 0.26 | -0.12 | C <sub>20</sub> H <sub>26</sub> NO <sub>11</sub> |
| 54 | 7,8-dimethoxy-6-hydroxycoumarin                 | 221 | 191,206b,207                                 | 221.045   | 221.04506 | 0.27 | 0.06  | C <sub>11</sub> H <sub>9</sub> O <sub>5</sub>    |
| 55 | Cotonoate A                                     | 291 | 121,165,247b                                 | 291.15964 | 291.15975 | 0.38 | 0.11  | C <sub>17</sub> H <sub>23</sub> O <sub>4</sub>   |
| 56 | Horizontoate A                                  | 263 | 148,164,219b                                 | 263.12834 | 263.12852 | 0.68 | 0.18  | C <sub>15</sub> H <sub>19</sub> O <sub>4</sub>   |
| 57 | 3,3',4'-tri-O-methylelagic acid                 | 343 | 255,284,299b,329                             | 343.0454  | 343.04554 | 0.41 | 0.14  | C <sub>17</sub> H <sub>11</sub> O <sub>8</sub>   |
| 58 | Scopoletin                                      | 191 | 104,105,120,148b,176                         | 191.03444 | 191.03439 | 0.26 | -0.05 | C <sub>10</sub> H <sub>7</sub> O <sub>4</sub>    |
| 59 | Arbutin                                         | 271 | 71,101,108b,109,113,161                      | 271.08178 | 271.08175 | 0.11 | -0.03 | C <sub>12</sub> H <sub>15</sub> O <sub>7</sub>   |
| 60 | 5-Methylgenistein                               | 283 | 239b,255,269                                 | 283.06065 | 283.06053 | 0.42 | -0.12 | C <sub>16</sub> H <sub>11</sub> O <sub>5</sub>   |
| 61 | Eriodictyol                                     | 287 | 119, 135b, 227                               | 287.05557 | 287.05577 | 0.70 | 0.20  | C <sub>15</sub> H <sub>12</sub> O <sub>6</sub>   |
| 62 | Luteolin                                        | 285 | 133, 151, 175, 199, 285b                     | 285.03992 | 285.03985 | 0.25 | -0.07 | C <sub>15</sub> H <sub>10</sub> O <sub>6</sub>   |
| 63 | Apigenin                                        | 269 | 117, 149, 151, 225, 269b                     | 269.04500 | 269.04509 | 0.33 | 0.09  | C <sub>15</sub> H <sub>10</sub> O <sub>5</sub>   |
| 64 | Biochanin                                       | 283 | 132, 184, 211, 212, 223, 239b, 240, 267, 268 | 283.06065 | 283.06055 | 0.35 | -0.10 | C <sub>16</sub> H <sub>12</sub> O <sub>5</sub>   |
| 65 | 5,7,2',5'-tetrahydroxyflavanone                 | 287 | 151,162b,259                                 | 287.05557 | 287.05564 | 0.24 | 0.07  | C <sub>15</sub> H <sub>11</sub> O <sub>6</sub>   |
| 66 | Naringenin                                      | 271 | 119,151b,187                                 | 271.06065 | 271.06061 | 0.15 | -0.04 | C <sub>15</sub> H <sub>11</sub> O <sub>5</sub>   |
| 67 | Horizontoate C                                  | 482 | 210,272b,288                                 | 482.42093 | 482.42097 | 0.08 | 0.04  | C <sub>29</sub> H <sub>56</sub> NO <sub>4</sub>  |

b – base peak
